# Supplementary material for: Structural basis of Zika virus helicase in recognizing its substrates
Source: PubMed Central journal article supplement (PMC4980333; doi:10.1007/s13238-016-0293-2), 2016-07-18
Supplement: 13238_2016_293_MOESM1_ESM.pdf [file 13238_2016_293_MOESM1_ESM.pdf]

## SUPPLEMENTAL MATERIALS

**Supplementary Table S1. Data collection, phasing and refinement statistics**

|                                                     | ZIKV helicase-ATP-Mn <sup>2+</sup> | ZIKV helicase-RNA     |
|-----------------------------------------------------|------------------------------------|-----------------------|
| <b>Data Collection</b>                              |                                    |                       |
| X-ray Source                                        | SSRF beamline BL19U1               |                       |
| Wavelength (Å)                                      | 0.97853 Å                          |                       |
| Space group                                         | <i>P2<sub>1</sub></i>              |                       |
| Unit cell a, b, c (Å)                               | 51.6, 74.2, 57.7,                  | 52.3, 72.3, 59.4,     |
| α, β, γ (°)                                         | 90.0, 92.2, 90.0                   | 90.0, 94.5, 90.0      |
| Resolution range* (Å)                               | 40.0-2.20 (2.24-2.20)              | 50.0-1.70 (1.73-1.70) |
| Unique reflections                                  | 21839 (1095)                       | 39662 (780)           |
| Completeness (%)                                    | 99.3 (99.5)                        | 82.0 (32.3)**         |
| Redundancy                                          | 6.7 (6.6)                          | 6.6 (5.2)             |
| <i>I</i> / $\sigma$ <i>I</i>                        | 22.8 (2.0)                         | 14.9 (2.9)            |
| <i>R</i> <sub>merge</sub>                           | 0.083 (0.942)                      | 0.130 (0.506)         |
| <b>Refinement</b>                                   |                                    |                       |
| Resolution range (Å)                                | 37.7-2.20                          | 40.7-1.70             |
| No. of reflections<br>(working/test)                | 40680/2043                         | 73821/4142            |
| <i>R</i> <sub>work</sub> / <i>R</i> <sub>free</sub> | 0.1970/0.2474                      | 0.1539/0.1956         |
| Number of atoms                                     |                                    |                       |
| Protein                                             | 3396                               | 3479                  |
| Water                                               | 107                                | 549                   |
| Ligand/ion                                          | 32                                 | 104                   |
| B-factors                                           |                                    |                       |
| Protein                                             | 55.1                               | 18.6                  |
| Water                                               | 51.9                               | 29.6                  |
| Ligand/ion                                          | 82.7                               | 16.7                  |
| r.m.s. deviations                                   |                                    |                       |
| Bond lengths (Å)                                    | 0.004                              | 0.008                 |
| Bond angles (°)                                     | 0.914                              | 1.145                 |

\* Numbers in the brackets are for the highest resolution shell.

\*\*Completeness is over 90% at resolution shell of 2.02 Å-1.96 Å.
